# Supplementary material
Source: publisher figshare collection journal article supplement (https://frontiersin.figshare.com/ndownloader/files/22754600)
Supplement: Supplementary file 1 [file 22754600]

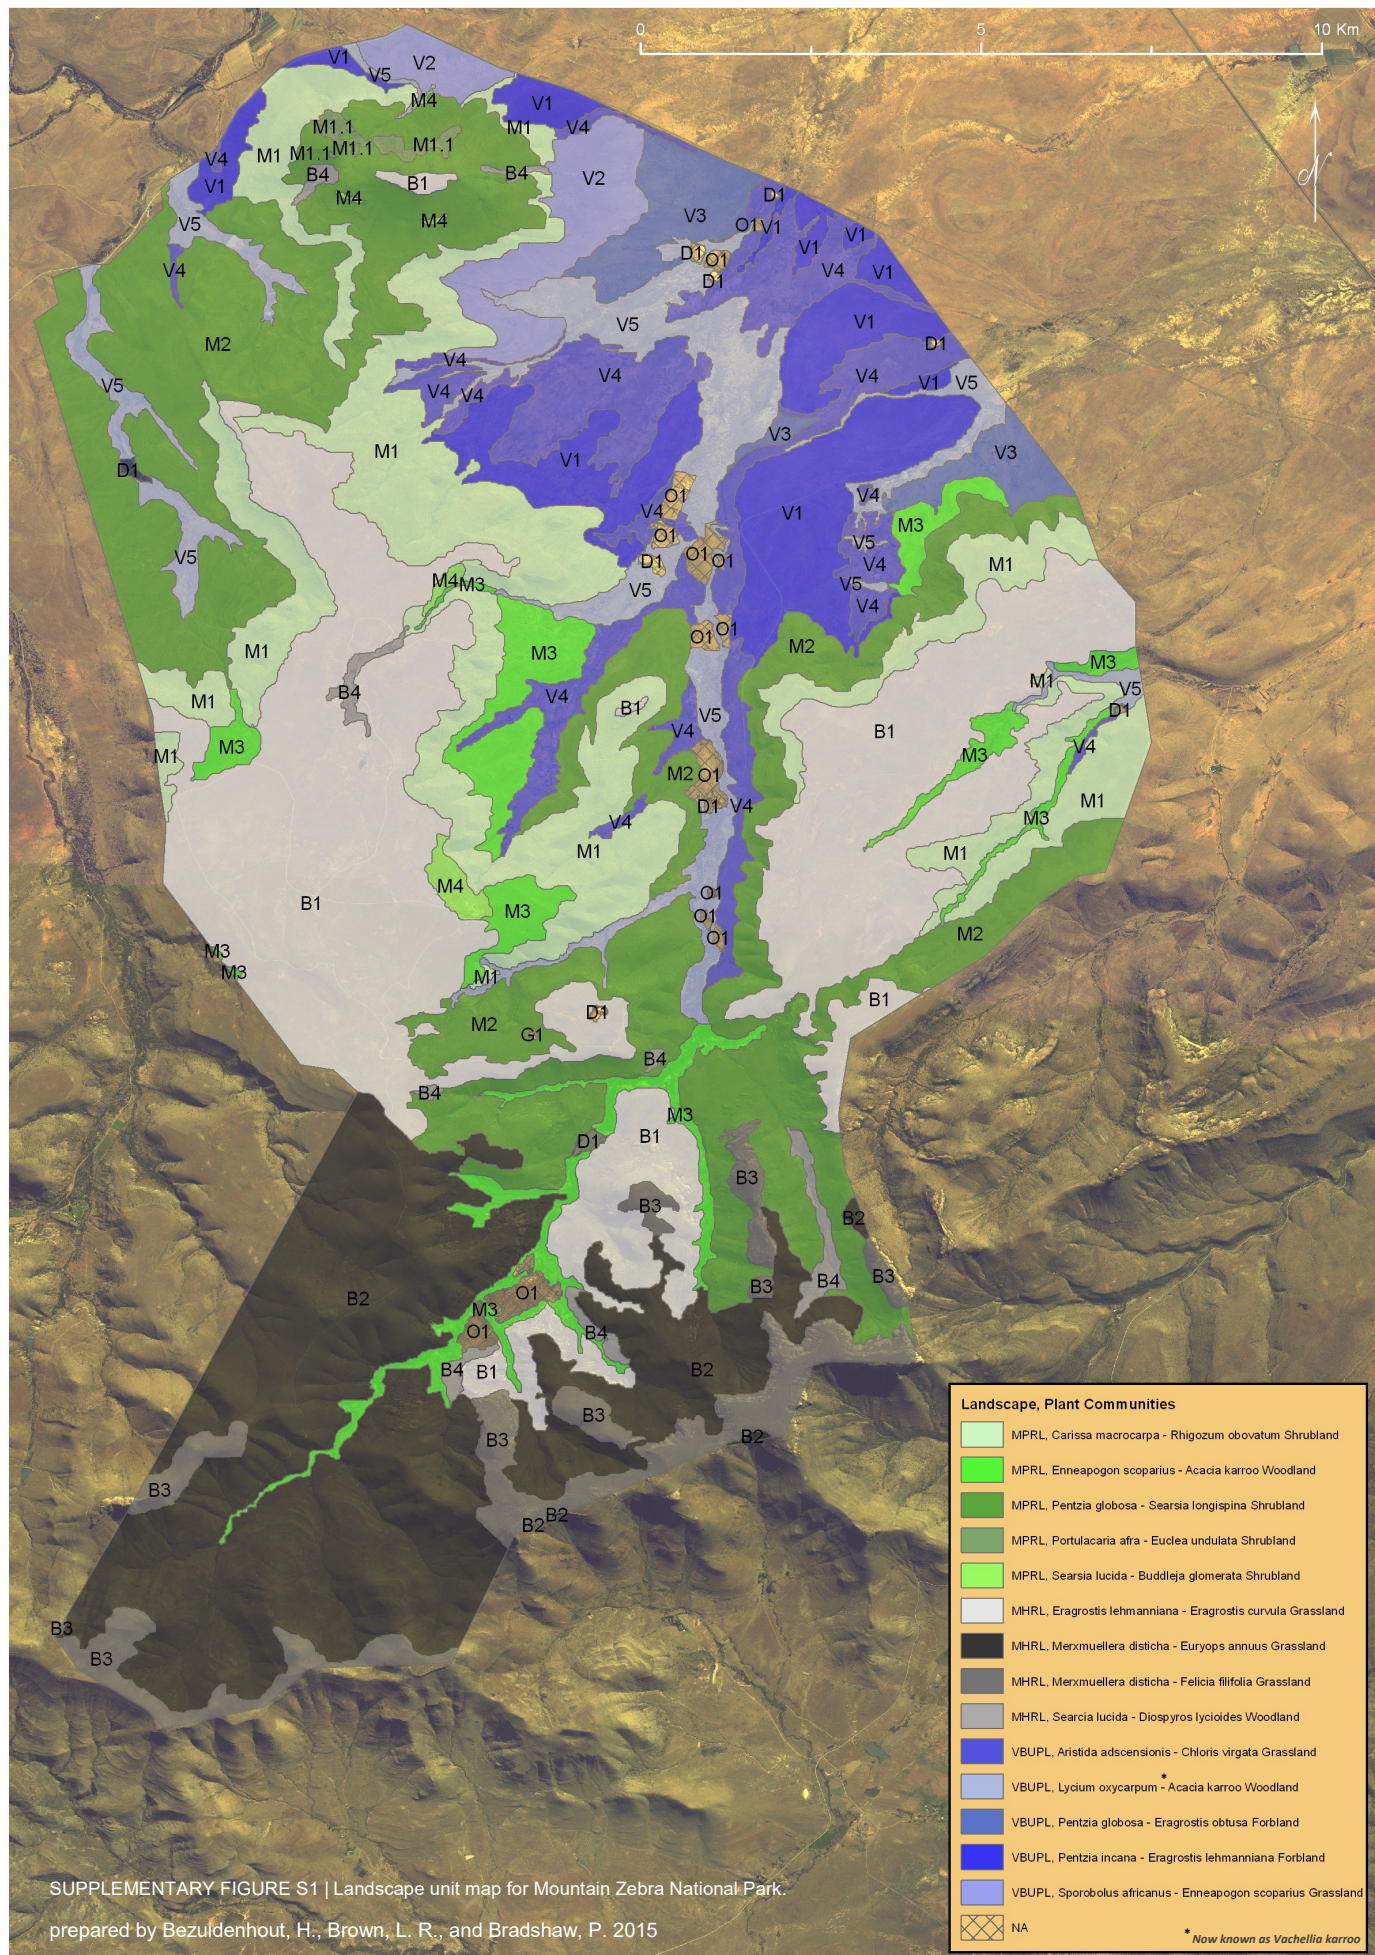

SUPPLEMENTARY FIGURE S1 | Landscape unit map for Mountain Zebra National Park.

prepared by Bezuidenhout, H., Brown, L. R., and Bradshaw, P. 2015
